# Supplementary material for: Mono- or Double-Site Phosphorylation Distinctly Regulates the Proapoptotic Function of Bax
Source: PubMed Central journal article supplement (PMC2954808; doi:10.1371/journal.pone.0013393), 2010-10-14
Supplement: pone.0013393.s001.pdf [file pone.0013393.s001.pdf]

## Supplemental Data

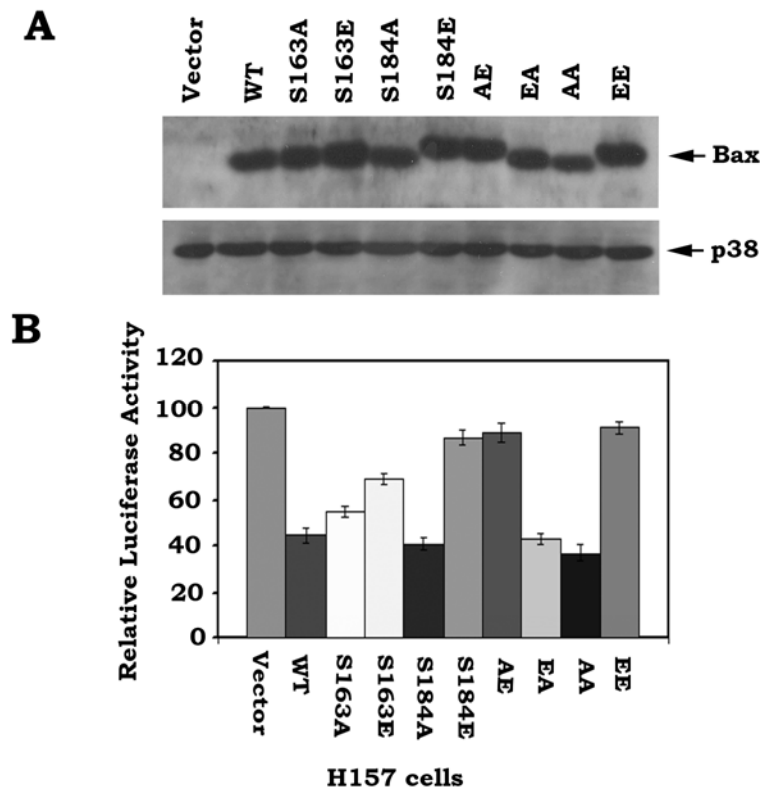

**Figure S1. Mono- or double-site Bax phosphorylation regulates its proapoptotic activity in H157 cells.** *A*, The pCIneo empty vector, T7-tagged WT and each of A- or E-Bax mutant cDNAs were transfected in H157 cells. After 24h, levels of exogenous Bax protein were determined by Western blot using T7 antibody. *B*, The mammalian expression vector pGL3 (Promega) carrying the firefly luciferase (Luc) gene was co-transfected with WT or each of Bax mutants in H157 cells. After 48h, cell viability was determined by luciferase assay as described in “Methods”. Data represent the mean  $\pm$  S.D. of three determinations.
